# Supplementary material
Source: PubMed Central journal article supplement (PMC4396987)
Supplement: NIHMS668920-supplement-01.pdf [file NIHMS668920-supplement-01.pdf]

represent captured and engulfed hepatic debris by BMMs, respectively. (b) ELISA-assisted TNF- $\alpha$  and IL-1 $\beta$  detection in co-culture supernatants (\*p<0.001). Representative of n=3/group.

**Figure 8.** TIM-4<sup>+</sup> macrophages trigger liver IRI in CD11b-DTR mice. Adoptive transfer of TIM-4 proficient (WT) but not TIM-4 deficient BMM ( $5 \times 10^6$  cells i.v. at -1h) recreated hepatocellular damage in CD11b-DTR mice (6h reperfusion after 90min ischemia), evidenced by (a) sALT levels; (b) hepatic histology (representative H&E; magnification x100 and x400); and (c) TNF- $\alpha$ , IL-1 $\beta$ , and IL-6 expression (\*p<0.001). n=4-6/group.

**Supplementary Figure 1.** Serum ALT levels in: (a) PBS- vs. DT-treated WT or CD11b-DTR mice at 6h post-infusion; (b) control Ig- or Diannexin-treated liver IRI (6h reperfusion after 90min ischemia; \*p<0.001, N.S. p>0.05). n=4/group.

**Supplementary Figure 2.** Suzuki's score of histological liver IR-damage in: (a) TIM-4 KO or WT mice treated with anti-TIM-4 mAb/control Ig; and (b) CD11b-DTR mice with/without DT-macrophage depletion; and repopulated with BMM from WT or TIM-4 KO donors ( $5 \times 10^6$  cells i.v. at -1h). (\*p<0.001). n=5-6/group.

**Supplementary Figure 3.** Flow cytometry-assisted TIM-4 expression by (a) CD11c<sup>+</sup>CD8<sup>+</sup> DCs and (b) CD11b<sup>Lo</sup>F4/80<sup>Hi</sup> Kupffer cells in IR-stressed livers. Representative of n=4-6/group.

**Supplementary Figure 4.** (a) TIM-1 gene induction in control Ig, or anti-TIM-4 mAb pretreated WT mice in liver IRI. (b) TIM-4 gene levels in WT livers subjected to ischemia alone (90min); or ischemia (90min) plus 6h reperfusion (\*p<0.001). n=5-6/group.

**Supplementary Table 1.** Primers used by qRT-PCR.

# Supplementary Fig. 1

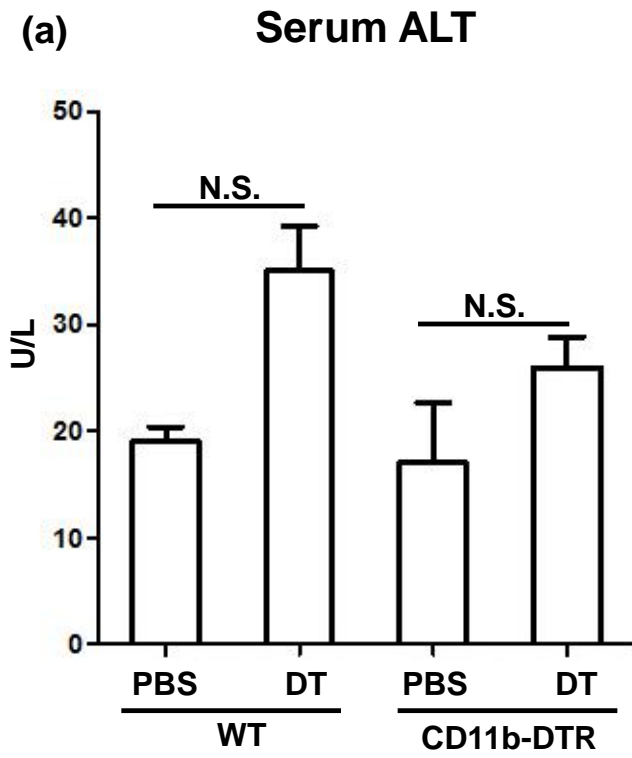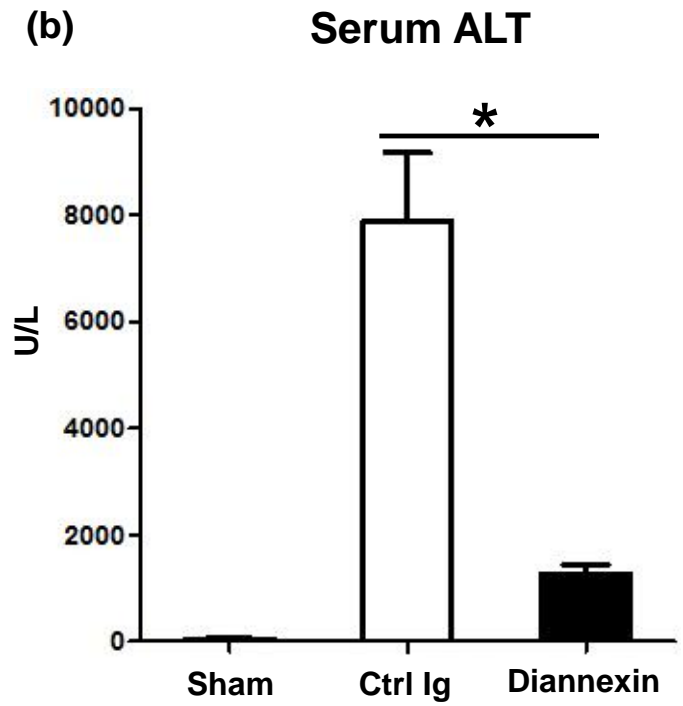

## Supplementary Fig. 2

(a) Suzuki's Liver IRI Score

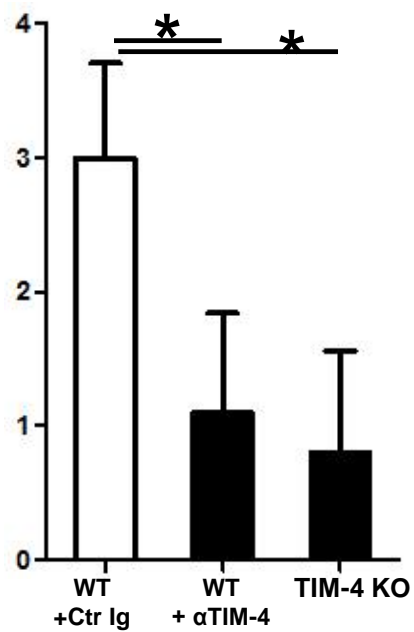

(b) Suzuki's Liver IRI Score in CD11b-DTR mice

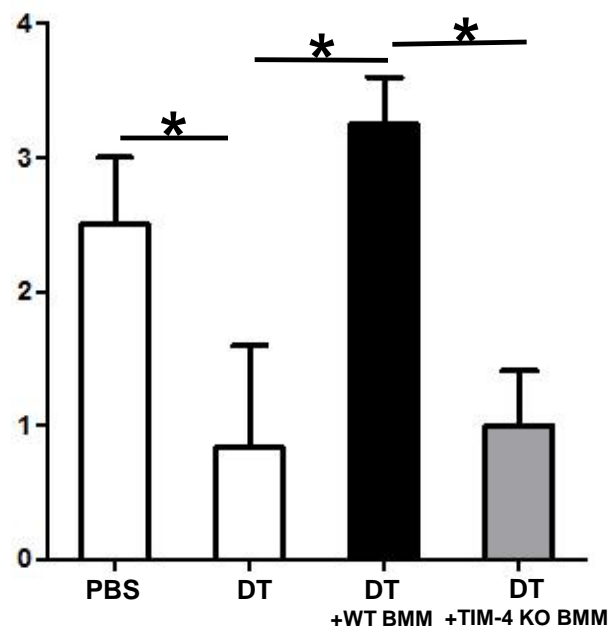

### Supplementary Fig. 3

(a) TIM-4 Expression on CD11c<sup>+</sup>CD8<sup>+</sup> DC

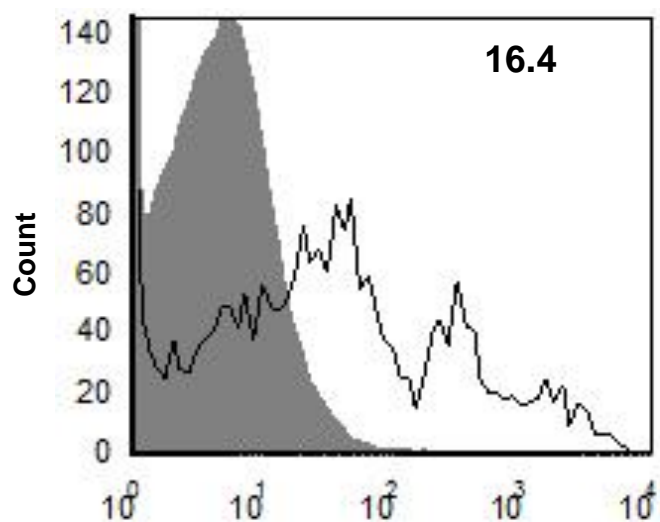

(b) TIM-4 Expression on CD11b<sup>L</sup>F4/80<sup>Hi</sup> Kupffer cells

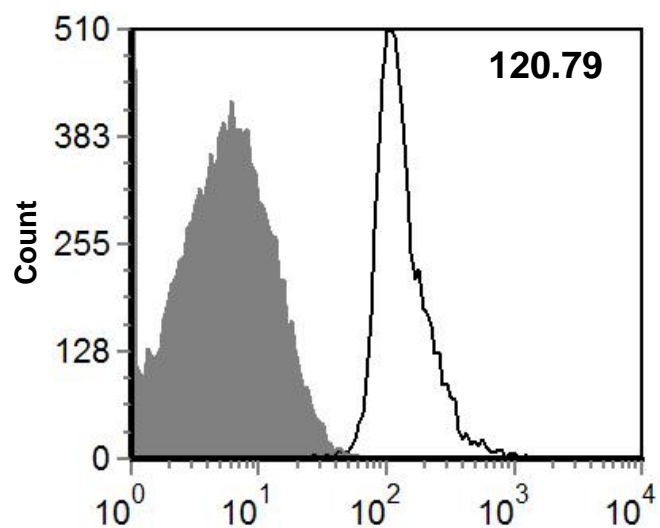

## Supplementary Fig. 4

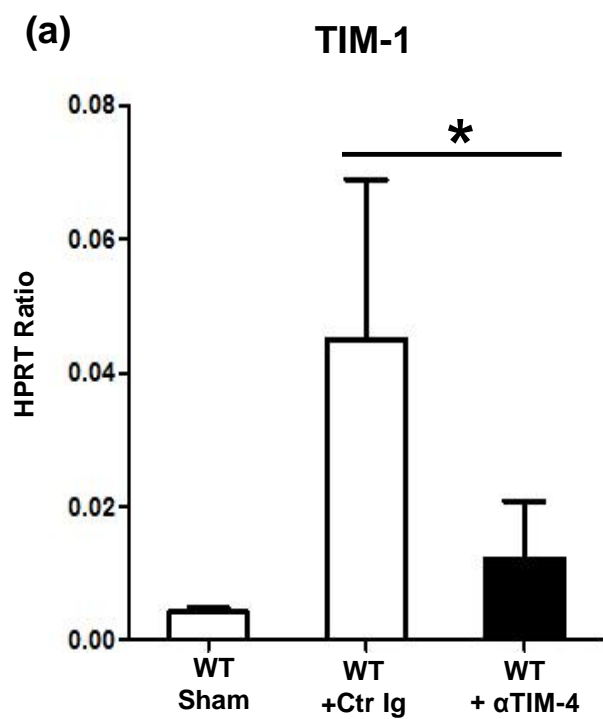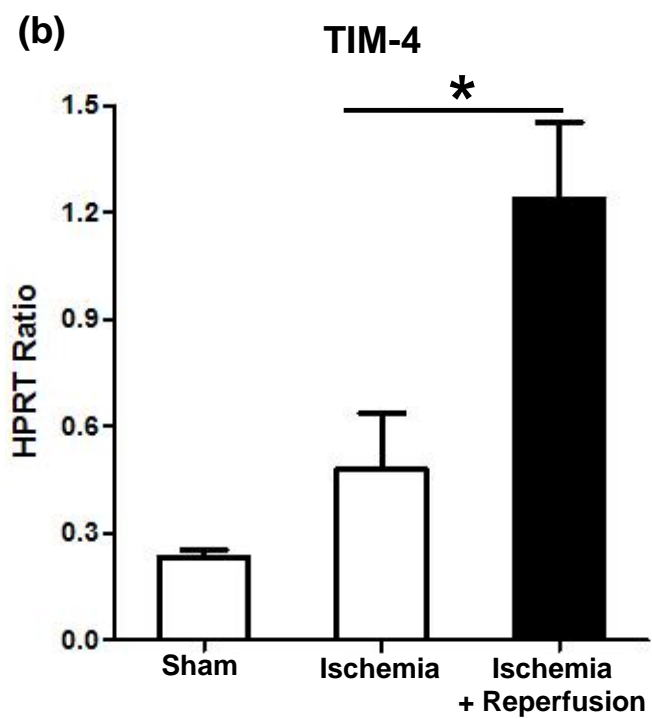

## Supplementary Table 1

### Primers used for Quantitative RT-PCR

| <b>Gene</b> | <b>sense</b>             | <b>antisense</b>       |
|-------------|--------------------------|------------------------|
| TIM-4       | gaagaatgtgcgcttggag      | gggtggttgttgttggttt    |
| IRF3        | ccccaagaaaatccactgaa     | ctcggtagaaggcggta      |
| SR-A        | ttctcctcctcctcctc        | tggaagggatcatagatgtcg  |
| LOX-1       | cccttattgtacagtggacacaat | gattcctgtgaagtgtttctgc |
| MARCO       | agggagacaaaggggaccta     | tggtttccagcatcacctt    |
| TLR2        | ggggcttcacttctctgctt     | agcatcctctgagatttgacg  |
| TLR4        | ggactctgatcatggcactg     | ctgatccatgcattggtagg   |
| TLR9        | gaatcctccatctcccaacat    | ccagagtctcagccagcact   |
